# Supplementary material for: Phase transition behavior of NaCrO2 during sodium extraction studied by synchrotron-based X-ray diffraction and absorption spectroscopy
Source: Royal Society of Chemistry journal article supplement (doi:10.1039/c3ta12282d), 2013-01-01
Supplement: c3ta12282d.pdf [file c3ta12282d.pdf]

## Phase transition behavior of NaCrO<sub>2</sub> during sodium extraction studied by synchrotron-based X-ray diffraction and absorption

Yong-Ning Zhou,<sup>a</sup> Jing-Jing Ding,<sup>b</sup> Kyung-Wan Nam,<sup>a</sup> Xi-Qian Yu,<sup>a</sup> Seong-Min Bak,<sup>a</sup> En-Yuan Hu,<sup>a</sup> Jue Liu,<sup>a</sup> Jian-Ming Bai,<sup>a</sup> Hong Li,<sup>c</sup> Zheng-Wen Fu,<sup>\*b</sup> and Xiao-Qing Yang<sup>\*a</sup>

<sup>a</sup> Brookhaven National Laboratory, Upton, NY 11973, USA

<sup>b</sup> Department of Chemistry, Fudan University, Shanghai, 200433, P.R.China

<sup>c</sup> Institute of Physics, Chinese academy of Sciences, Beijing, 100190, P.R. China

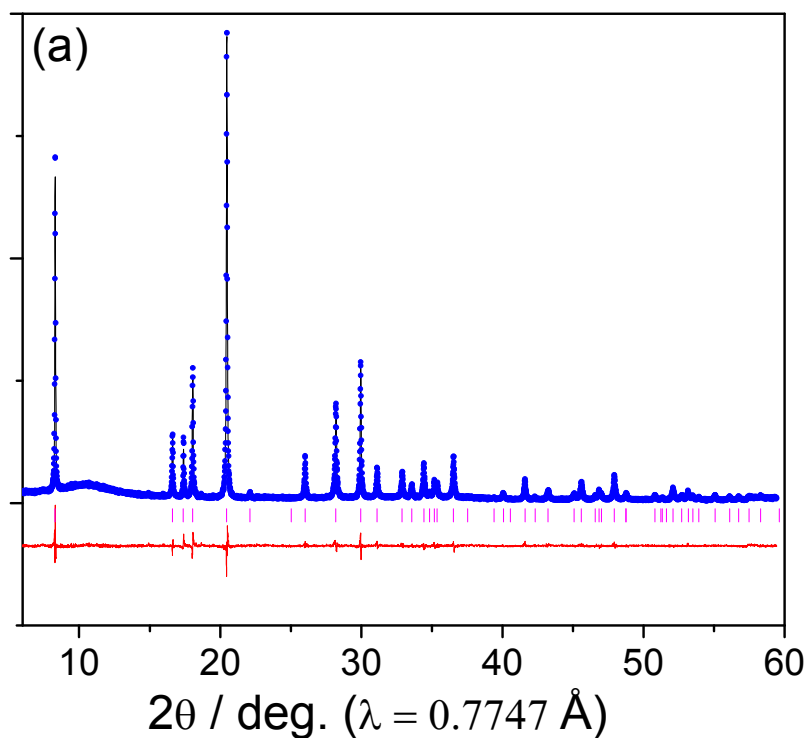

Fig. S1 Synchrotron diffraction pattern of NaCrO<sub>2</sub> and Rietveld refinement of its structure. The experimental (blue circles) and the calculated (black line) X-ray diffraction patterns are in good agreement with the smooth difference line (red line). The space group is R-3m. The calculated lattice parameters are: a=b=2.9768(6) Å, c= 16.9895(3) Å.

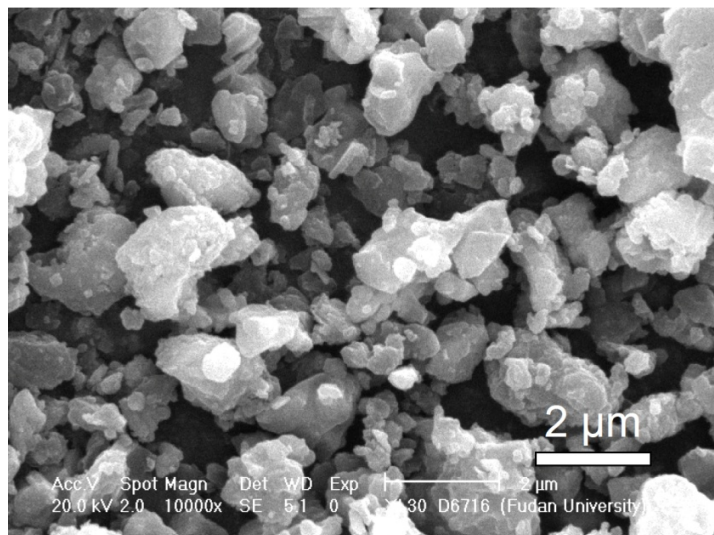

Fig. S2 SEM image of the pristine NaCrO<sub>2</sub> powder.

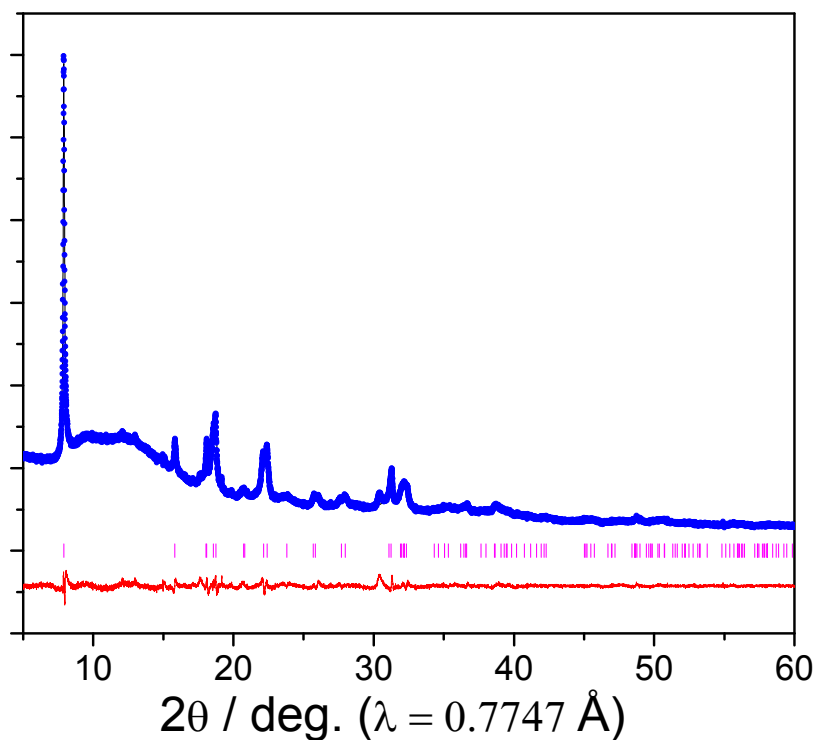

Fig. S3 *Ex-situ* synchrotron x-ray diffraction pattern of the fully charged NaCrO<sub>2</sub> ( $\sim$ Na<sub>0.5</sub>CrO<sub>2</sub>) and Rietveld refinement of its structure. The experimental (blue circles) and the calculated (black line) X-ray diffraction patterns are in good agreement with the smooth difference line (red line). It was indexed with a monoclinic cell (space group: C2/m) with the following parameters:  $a_M (\sim \sqrt{3} a_R) = 5.0178(7)$  Å,  $b_M (\sim b_R) = 2.8828(3)$ ,  $c_M (\sim c_R/3\sin\beta) = 5.9027(5)$  Å,  $\beta = 106.97^\circ$ .

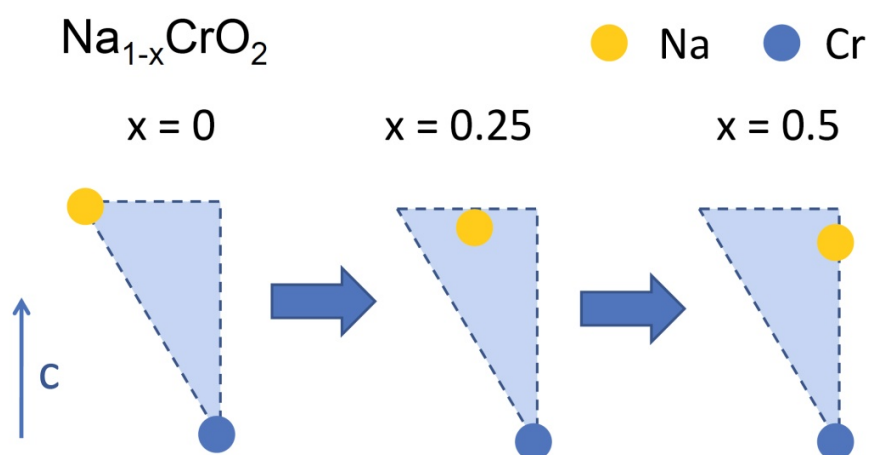

Fig. S4 Schematic for the relative position between Cr and Na ions in  $\text{Na}_{1-x}\text{CrO}_2$  at different charge state ( $x=0, 0.25, 0.5$ ). It corresponds to the Na coordination evolution from octahedral to pseudo-tetrahedral, then to trigonal-prismatic.
